# Supplementary material for: Enhancement in Charge Carrier Mobility by Using Furan as Spacer in Thieno[3,2-b]Pyrrole and Alkylated-Diketopyrrolopyrrole Based Conjugated Copolymers
Source: MDPI journal article supplement (doi:10.3390/app12063150), 2022-03-19
Supplement: s1 [file s1]

Archive with 1 entries (1 files):
- applsci-1625527-supplementary.pdf
